# Supplementary material for: From convolution to clarity: effect of different point spread functions for deconvolution in CLSM and STED microscopy images of the nuclear lamina
Source: publisher site journal article supplement (doi:10.1515/mim-2025-0025), 2025-12-01
Supplement: Supplementary file 1 [file j_mim-2025-0025_suppl_001.docx]

**Appendix**

***Table A1:*** *Lamina thickness in CLSM and STED microscopy images of NHDF stained for lamins A/C and deconvolved with different PSFs. The lamina thickness is determined by calculating the Full Width at Half Maximum (FWHM) of intensity plots drawn perpendicular to the lamina as shown in Figure A1 B, D. Values represent average FWHM ± SD. The FWHM is determined at five positions in each nucleus, for 10 nuclei in total.*

| **PSF used for deconvolution** | **CLSM**  **lamins A/C (nm)** | **STED microscopy lamins A/C (nm)** | **CLSM**  **lamin B1 (nm)** | **STED microscopy lamin B1 (nm)** |
| --- | --- | --- | --- | --- |
| **Theoretical** | 219 ± 29 | 108 ±22 | 201 ± 22 | 122 ± 17 |
| **Experimental** | 210 ± 24 | 110 ± 19 | 186 ± 13 | 162 ± 33 |
| **EST** | N/A | 116 ± 26 | N/A | 122 ± 17 |


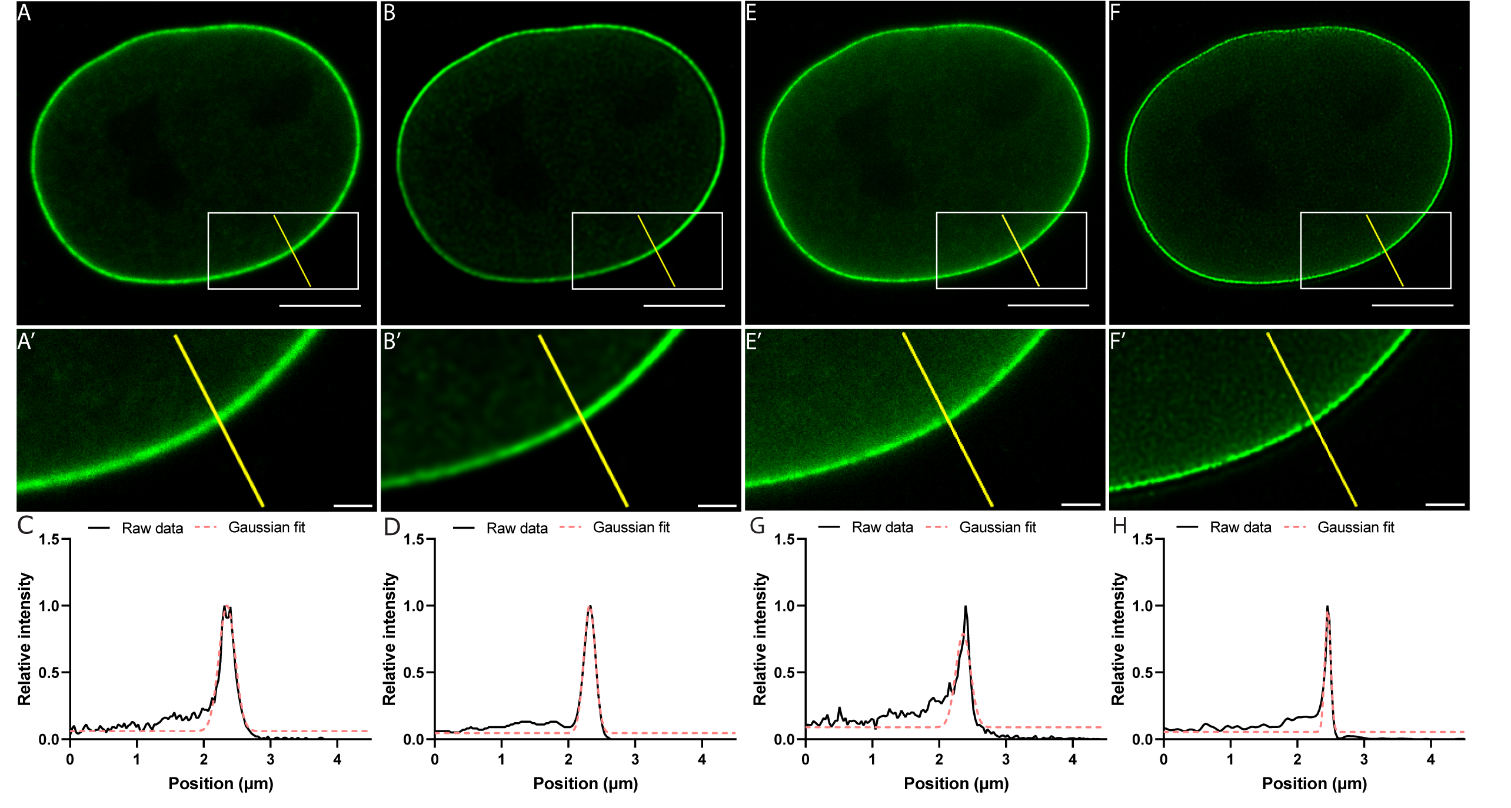


***Figure A1:*** *Full Width at Half Maximum (FWHM) determination in CLSM and STED microscopy images of NHDF immunostained for lamins A/C.* ***A-B****) CLSM microscopy images of lamins A/C, either non-deconvolved (****A****) or deconvolved with the experimental PSF (****B****); the yellow line is used for the plot profiles displayed in (****C-D****).* ***A’-B’****) Higher magnification of the ROIs (white boxes) in (****A****) and (****B****), respectively.* ***C-D****) Example of a Gaussian fit of a CLSM microscopy image not deconvolved (****C****) or deconvolved with the experimental PSF (****D****); Gaussian fit (pink dotted line) of the plot profile (black solid line) of the yellow line in (****A-B****).* ***E-F****) STED microscopy image of lamins A/C, either non-deconvolved (****E****) or deconvolved with the EST PSF (****F****); the yellow line is used for the plot profiles displayed in (****G-H****).* ***E’-F’****) Higher magnifications of the ROIs (white boxes) in (****E****) and (****F****), respectively.* ***G****) Example of a Gaussian fit of the non-deconvolved STED microscopy image displayed in (****E****). Note that the height of the fitted curve (pink dotted line) is lower as compared to the raw data (black solid line) and therefore the FWHM of the fitted peak will be broader than is truly the case in the raw data.* ***H****) Example of a Gaussian fit of the deconvolved STED microscopy image displayed in (****F****). Scale bars A-B, E-F: 5 µm. Scale bars A’, B’, E’, F’: 1 µm.*
